WINTER 2025 | VOLUME 23 | NUMBER 1

# Focus

The Journal of Lifelong Learning in Psychiatry

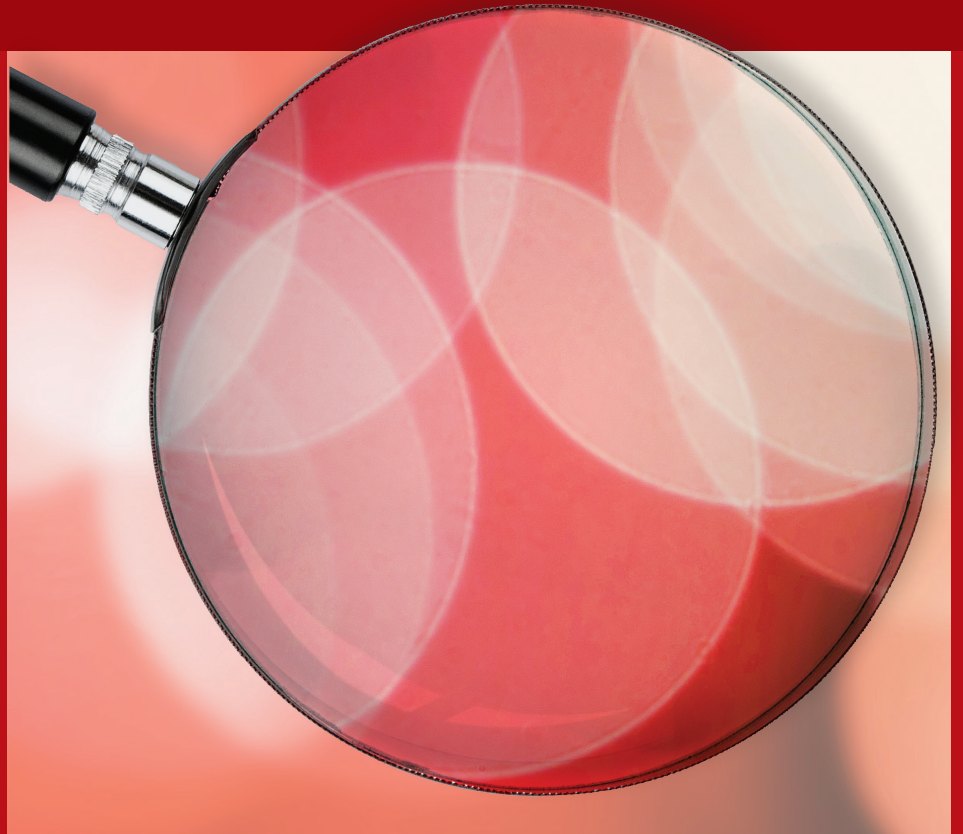

## Eradicating Stigma: Where We're Going

Guest Editor: Darrell G. Kirch, M.D.
